# Supplementary material
Source: PubMed Central journal article supplement (PMC3416056)
Supplement: EC.00075-12_zek999093950so1.pdf [file EC.00075-12_zek999093950so1.pdf]

## Supporting Figures and Tables

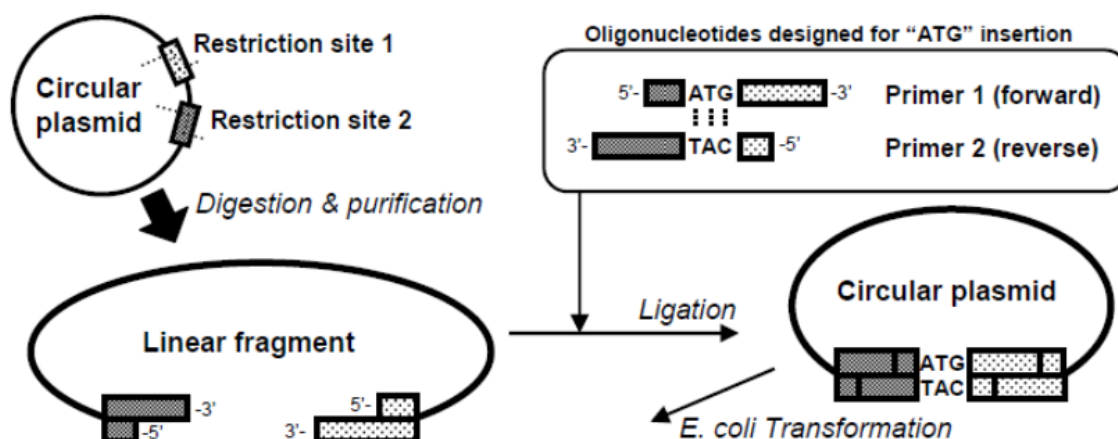

**Figure S1. Schematic illustration of the one-step construction method for plasmids (OSCoM-P).** The digested linear fragments of the plasmids were ligated with the designed primers at a dry weight ratio of 1:1–1:10 (linear plasmid:each primer). The reaction solution was directly transformed into *E. coli* DH5 $\alpha$  competent cells (Toyobo). The purchased oligonucleotides were dissolved in dH<sub>2</sub>O at 10 ng/ $\mu$ L before use. TE buffer was not used because OSCoM-P was severely inhibited by the presence of TE buffer (data not shown). Maximum length of fragments to be inserted into plasmids using OSCoM-P is 45 bp (data not shown).

Miura, et al.

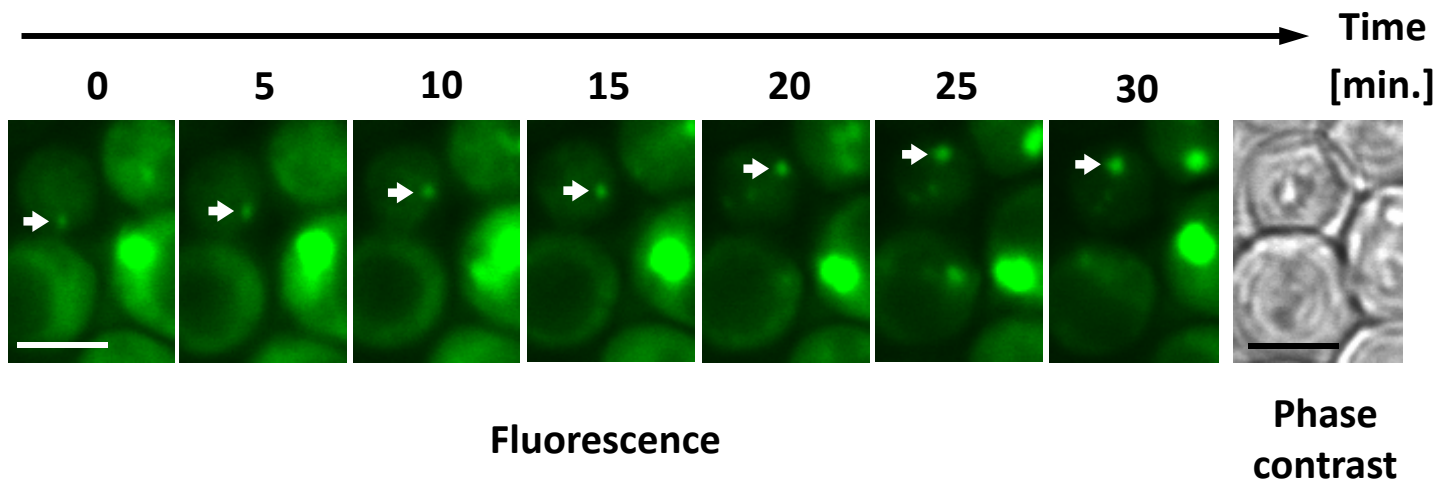

**Figure S2. Time-dependent localization change of the eno(1–28) fragment fused to EGFP.**

Scale bar: 5  $\mu$ m.

Miura, et al.

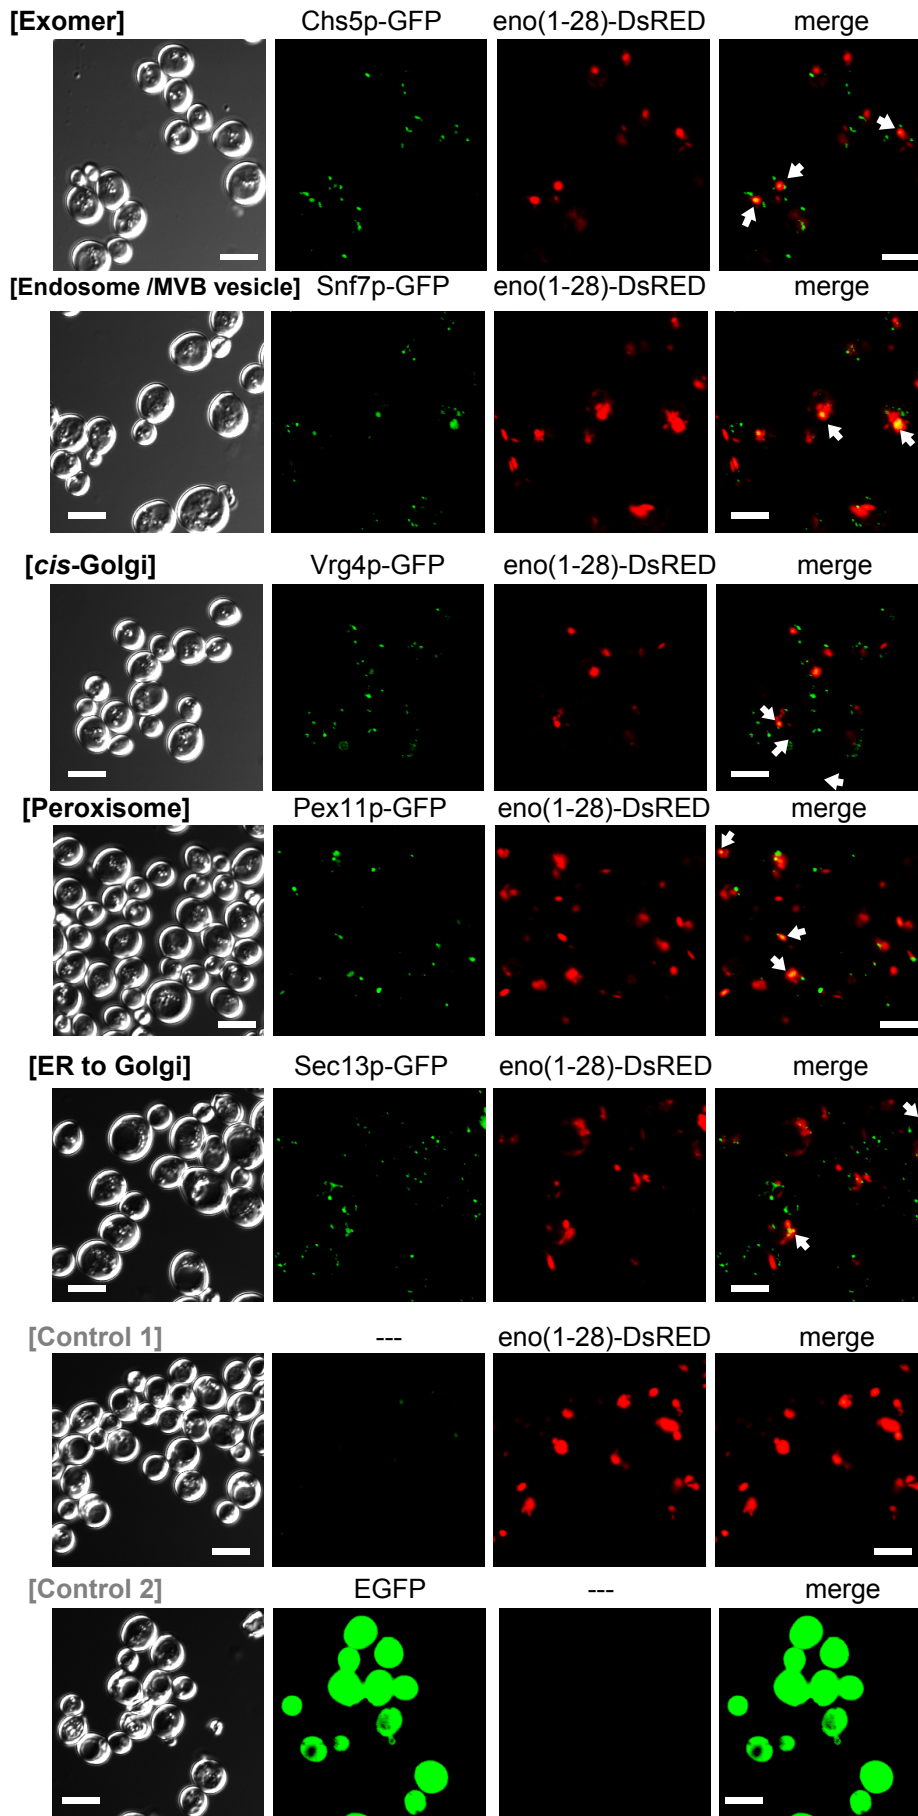

**Figure S3. Co-localization of the enolase fragment conjugated to DsRED and the organelle markers conjugated to GFP (continued from Fig. 3).** Control 1, wild-type cells transformed with pULR-eno(1-28); control 2, wild-type cells transformed with pUL-ATG-EGFP. Scale bar: 5  $\mu$ m.

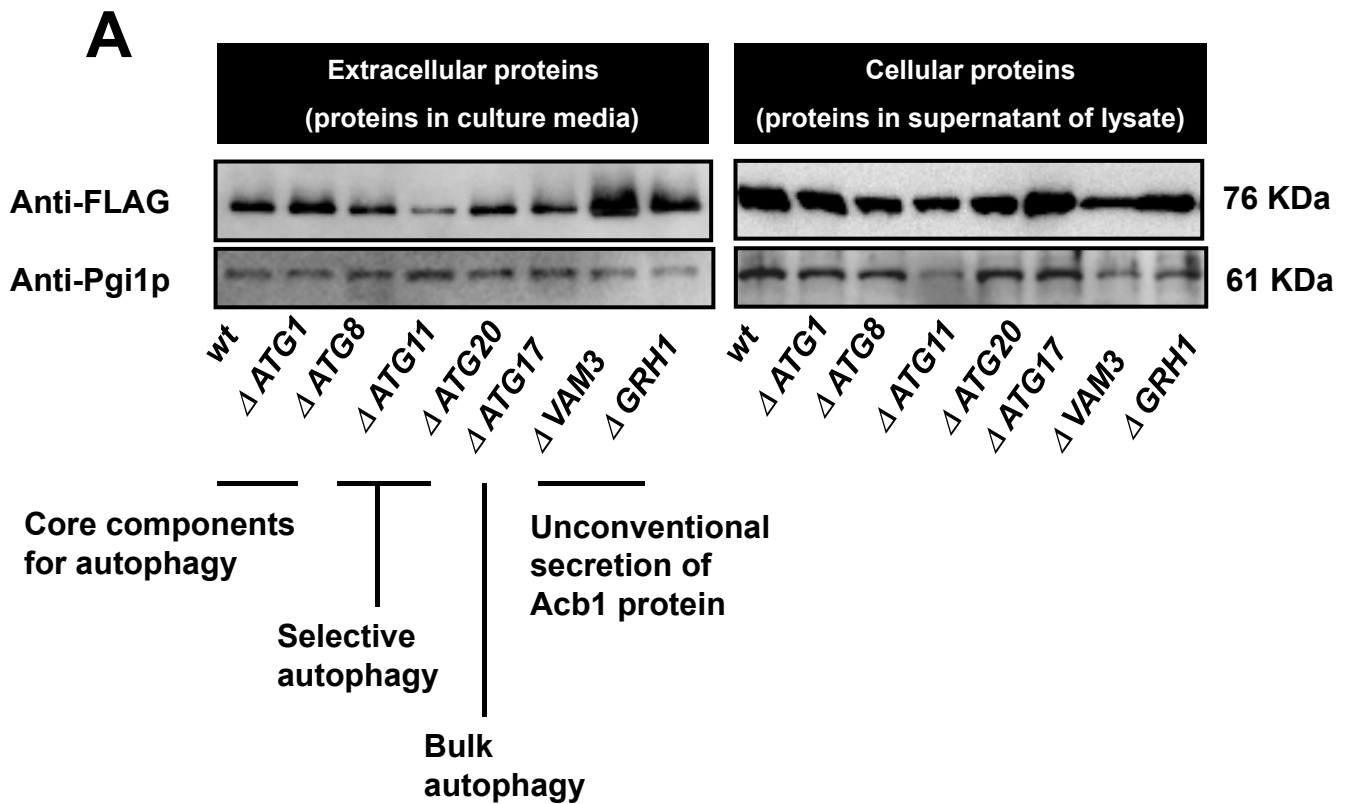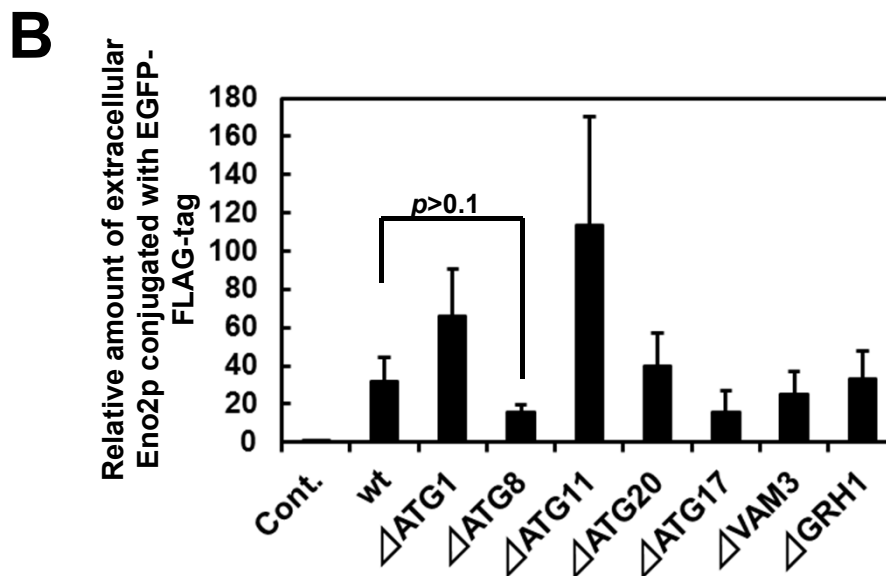

**Figure S4. Autophagy independency of Eno2p and Pgi1p secretion.** A: Western blots. B: Calculated amounts of secreted Eno2p by comparison to the Pgi1p secreted. Values are the mean  $\pm$  SEM of 3 independent experiments.

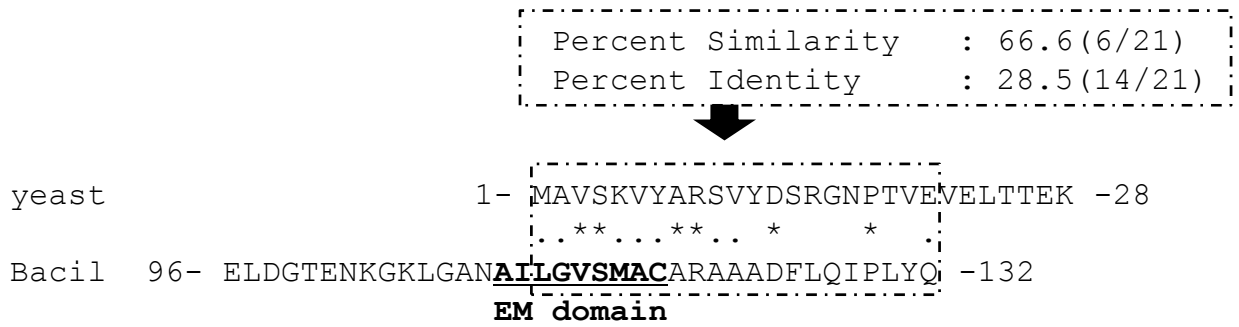

**Figure S5. Similarity of eno(1-28) region with EM domain.** Percent similarity and percent identity between the two sequences in the box with dotted line are shown. Yeast, *S. cerevisiae* enolase (1-28) aa sequence; Bacil, *Bacillus subtilis* enolase (96-132) aa sequence including EM domain (56); underline, EM domain; asterisk, identical amino acid residues; dot, similar amino acid residues.

**Miura, et al.**

**Table S1. List of identified noncovalently-bound cell surface proteins**

The data is available in the PRIDE database (57, [www.ebi.ac.uk/pride](http://www.ebi.ac.uk/pride)) under accession number 26880. The data was converted using PRIDE Converter (58, <http://pride-converter.googlecode.com>).

| Cellular process       | Accession   | SGDID                     | Name                                  | Description                                                                                         | # AAs                                               | MW [kDa]                           | calc. pI                                                        | ΣCover age | Σ# PSMs | Σ# Peptides |    |    |    |
|------------------------|-------------|---------------------------|---------------------------------------|-----------------------------------------------------------------------------------------------------|-----------------------------------------------------|------------------------------------|-----------------------------------------------------------------|------------|---------|-------------|----|----|----|
| <b>Metabolism</b>      | Glycolysis  | YHR174W                   | S000001217                            | ENO2                                                                                                | Enolase II, a phosphopyruvate hydratase             | 437                                | 46.9                                                            | 6.0        | 31      | 41          | 9  |    |    |
|                        |             | YGR192C                   | S000003424                            | TDH3                                                                                                | Glyceraldehyde-3-phosphate dehydrogenase, isozyme 3 | 332                                | 35.7                                                            | 7.0        | 40      | 53          | 8  |    |    |
|                        |             | YCR012W                   | S00000605                             | PGK1                                                                                                | 3-phosphoglycerate kinase                           | 416                                | 44.7                                                            | 7.6        | 32      | 28          | 8  |    |    |
|                        |             | YJL052W                   | S000003588                            | TDH1                                                                                                | Glyceraldehyde-3-phosphate dehydrogenase, isozyme 1 | 332                                | 35.7                                                            | 8.3        | 32      | 32          | 7  |    |    |
|                        |             | YDR050C                   | S000002457                            | TPI1                                                                                                | Triose phosphate isomerase                          | 248                                | 26.8                                                            | 6.0        | 35      | 38          | 6  |    |    |
|                        |             | YJR009C                   | S000003769                            | TDH2                                                                                                | Glyceraldehyde-3-phosphate dehydrogenase, isozyme 2 | 332                                | 35.8                                                            | 7.0        | 26      | 33          | 6  |    |    |
|                        |             | YGR254W                   | S000003486                            | ENO1                                                                                                | Enolase I, a phosphopyruvate hydratase              | 437                                | 46.8                                                            | 6.6        | 20      | 32          | 6  |    |    |
|                        |             | YKL152C                   | S000001635                            | GPM1                                                                                                | Tetrameric phosphoglycerate mutase                  | 247                                | 27.6                                                            | 8.8        | 26      | 21          | 5  |    |    |
|                        |             | YAL038W                   | S000000036                            | CDC19                                                                                               | Pyruvate kinase                                     | 500                                | 54.5                                                            | 7.7        | 13      | 10          | 5  |    |    |
|                        |             | YBR196C                   | S000000400                            | PGI1                                                                                                | Phosphoglucose isomerase                            | 554                                | 61.3                                                            | 6.5        | 10      | 6           | 4  |    |    |
|                        |             | YKL060C                   | S000001543                            | FBA1                                                                                                | Fructose 1,6-bisphosphate aldolase                  | 359                                | 39.6                                                            | 5.8        | 13      | 5           | 3  |    |    |
|                        |             | Amino acid biosynthesis   | Methionine biosynthesis               | YER091C                                                                                             | S000000893                                          | MET6                               | Cobalamin-independent methionine synthase                       | 767        | 85.8    | 6.5         | 17 | 21 | 10 |
|                        |             |                           |                                       | YIL051C                                                                                             | S000001313                                          | MMF1                               | Mitochondrial protein required for transamination of isoleucine | 145        | 15.9    | 9.3         | 49 | 15 | 5  |
|                        |             |                           | Methionine and threonine biosynthesis | YDR158W                                                                                             | S000002565                                          | HOM2                               | Aspartic beta semi-aldehyde dehydrogenase                       | 365        | 39.5    | 6.7         | 19 | 13 | 5  |
|                        |             |                           | Glycine catabolic process             | YAL044C                                                                                             | S000000042                                          | GCV3                               | H subunit of the mitochondrial glycine decarboxylase complex    | 170        | 18.8    | 4.7         | 30 | 12 | 4  |
|                        |             |                           | Lysine biosynthesis                   | YIL094C                                                                                             | S000001356                                          | LYS12                              | Homo-isocitrate dehydrogenase                                   | 371        | 40.0    | 8.0         | 15 | 7  | 4  |
|                        |             |                           | Histidine biosynthesis                | YOR202W                                                                                             | S000005728                                          | HIS3                               | Imidazoleglycerol-phosphate dehydratase                         | 220        | 23.8    | 6.4         | 15 | 5  | 2  |
|                        |             | TCA cycle                 | YKL085W                               | S000001568                                                                                          | MDH1                                                | Mitochondrial malate dehydrogenase | 334                                                             | 35.6       | 8.5     | 10          | 3  | 2  |    |
|                        |             | Pentose phosphate pathway | YPR074C                               | S000006278                                                                                          | TKL1                                                | Transketolase                      | 680                                                             | 73.8       | 7.0     | 4           | 3  | 2  |    |
| Alcoholic fermentation | YLR044C     | S0000004034               | PDC1                                  | Pyruvate decarboxylase                                                                              | 563                                                 | 61.5                               | 6.2                                                             | 33         | 36      | 13          |    |    |    |
| Fatty acid metabolism  | YGR037C     | S000003269                | ACB1                                  | Acyl-CoA-binding protein                                                                            | 87                                                  | 10.1                               | 4.9                                                             | 59         | 7       | 3           |    |    |    |
| <b>Protein binding</b> | YAL005C     | S000000004                | SSA1                                  | ATPase involved in protein folding and nuclear localization signal (NLS)-directed nuclear transport | 642                                                 | 69.6                               | 5.1                                                             | 5          | 5       | 3           |    |    |    |
|                        | YMR186W     | S000004798                | HSC82                                 | Cytoplasmic chaperone of the Hsp90 family                                                           | 705                                                 | 80.8                               | 4.8                                                             | 4          | 8       | 2           |    |    |    |
|                        | YDR155C     | S000002562                | CPR1                                  | Cytoplasmic peptidyl-prolyl cis-trans isomerase                                                     | 162                                                 | 17.4                               | 7.4                                                             | 17         | 6       | 2           |    |    |    |
|                        | YLL050C     | S000003973                | COF1                                  | Cofilin (Actin binfing)                                                                             | 143                                                 | 15.9                               | 5.2                                                             | 22         | 4       | 2           |    |    |    |
|                        | YBR109C     | S000000313                | CMD1                                  | Calmodulin                                                                                          | 147                                                 | 16.1                               | 4.3                                                             | 21         | 3       | 2           |    |    |    |
|                        | YJL034W     | S000003571                | KAR2                                  | ATPase involved in protein import into the ER                                                       | 682                                                 | 74.4                               | 4.9                                                             | 3          | 2       | 2           |    |    |    |
|                        | YML028W     | S000004490                | TSA1                                  | Thioredoxin peroxidase                                                                              | 196                                                 | 21.6                               | 5.1                                                             | 31         | 10      | 4           |    |    |    |
| <b>Homeostasis</b>     | YLR043C     | S0000004033               | TRX1                                  | Cytoplasmic thioredoxin isoenzyme                                                                   | 103                                                 | 11.2                               | 4.9                                                             | 49         | 8       | 4           |    |    |    |
|                        | YGR209C     | S000003441                | TRX2                                  | Cytoplasmic thioredoxin isoenzyme                                                                   | 104                                                 | 11.2                               | 4.9                                                             | 49         | 8       | 4           |    |    |    |
|                        | YFL014W     | S000001880                | HSP12                                 | Heat Shock Protein                                                                                  | 109                                                 | 11.7                               | 5.4                                                             | 23         | 4       | 3           |    |    |    |
|                        | YHR008C     | S000001050                | SOD2                                  | Mitochondrial manganese superoxide dismutase                                                        | 233                                                 | 25.8                               | 8.5                                                             | 17         | 2       | 2           |    |    |    |
|                        | YJL138C     | S000003674                | TIF2                                  | Translation initiation factor eIF-4A                                                                | 395                                                 | 44.7                               | 5.1                                                             | 10         | 8       | 3           |    |    |    |
| <b>Translation</b>     | YEL034W     | S000000760                | HYP2                                  | Translation elongation factor eIF-5A                                                                | 157                                                 | 17.1                               | 5.0                                                             | 19         | 12      | 2           |    |    |    |
|                        | YDR385W     | S000002793                | EFT2                                  | Elongation factor 2                                                                                 | 842                                                 | 93.2                               | 6.3                                                             | 3          | 2       | 2           |    |    |    |
|                        | YDR382W     | S000002790                | RPP2B                                 | Ribosomal protein P2 beta                                                                           | 110                                                 | 11.0                               | 4.1                                                             | 24         | 2       | 2           |    |    |    |
|                        | YCL043C     | S000000548                | PDI1                                  | Protein disulfide isomerase                                                                         | 522                                                 | 58.2                               | 4.5                                                             | 27         | 28      | 10          |    |    |    |
| <b>Signaling</b>       | YMR116C     | S000004722                | ASC1                                  | G-protein beta subunit and guanine nucleotide dissociation inhibitor for Gpa2p                      | 319                                                 | 34.8                               | 6.2                                                             | 34         | 28      | 8           |    |    |    |
| <b>Traffic</b>         | Endocytosis | YIL041W                   | S000001303                            | GVP36                                                                                               | BAR domain-containing protein                       | 326                                | 36.6                                                            | 5.0        | 20      | 6           | 4  |    |    |
| <b>Unknown</b>         | YOL154W     | S000005514                | ZPS1                                  | Zinc- and pH-regulated surface protein                                                              | 249                                                 | 27.5                               | 5.0                                                             | 27         | 17      | 5           |    |    |    |
|                        | YDR519W     | S000002927                | FPR2                                  | Membrane-bound peptidyl-prolyl cis-trans isomerase (PPIase).                                        | 135                                                 | 14.5                               | 5.5                                                             | 34         | 8       | 3           |    |    |    |
|                        | YPL225W     | S00000061                 | YPL225W                               | Unknown                                                                                             | 146                                                 | 17.4                               | 5.3                                                             | 16         | 4       | 2           |    |    |    |

**Table S2. Primers used in this research (continuing)**

| Plasmid                       | Oligo name                      | Description                                                      | Sequence (5'-3')                                 |
|-------------------------------|---------------------------------|------------------------------------------------------------------|--------------------------------------------------|
| pUL1                          | GAP-Pro-F                       | Primer for amplification of MCS-tGAPDH (forward)                 | CTTAAACTTCTAAATCTACTTTTATAGTTAGTC                |
|                               | KpnI-TGAP-R                     | Primer for amplification of MCS-tGAPDH (reverse)                 | ATGCTGGTACCTCAATCAATGAATGAAATGTCAATAAATAG        |
| pUL-ATG-EGFP                  | EcATGXhOSCoM_F                  | Oligonucleotide for OSCoM (forward)                              | AATTCATGC                                        |
|                               | EcATGXhOSCoM_R                  | Oligonucleotide for OSCoM (reverse)                              | TCGAGCATG                                        |
| pRS423-ATG-EGFP               | GAPDH promoter -F               | Primer for amplification of pGAPDH-EGFP-FLAGtag-tGAPDH (forward) | GGTACGGGATTCAACAGTCTCACAGGAACACCAC               |
|                               | GAPDH terminator -R             | Primer for amplification of pGAPDH-EGFP-FLAGtag-tGAPDH (forward) | ATAAGAATCGGGCGCTCAATCAATGAATCGAAAATGTCAAT        |
| pUL-ATG-DsRED                 | DsRed-EcoRIATGXho1 F            | Primer for amplification of DsRED from pKRD4 (forward)           | TAAACAGAAATTCATGCTCGAGGGTGGATCTGGTGCGACAACACCGA  |
|                               | DsRed-Sal1 R                    | Primer for amplification of DsRED from pKRD4 (reverse)           | GTTCAACCAAGTGCAGTACTAGTGGAGCGGAGTGGCGGGCCCTCG    |
|                               | seqDsRED(27-34)                 | Primer for sequencing DsRED                                      | CGAGTTCATGCGCTTCAAGG                             |
| pULGI2                        | pULSG1mcskaIF                   | Oligonucleotide for OSCoM (forward)                              | AATTCGGATCCCGGCTCGAGCGGAGATCTCGGGAGCTCCCGG       |
|                               | pULSG2mcskaIR                   | Oligonucleotide for OSCoM (reverse)                              | TCGACCGGGAGCTCCCGAGATCTCCGCTCGAGCCGGGATCCG       |
| pULGI2-ATG-HA                 | ATG-HAtagF (pULGI2)             | Oligonucleotide for OSCoM (forward)                              | AATTCATGTACCCATACGATGTTCCAGATTACGGTG             |
|                               | ATG-HAtagR (pULGI2)             | Oligonucleotide for OSCoM (reverse)                              | GATCCAGGGTAACTCGGAACATCGTATGGGTACATG             |
| pULGI2-ENO2/ pULGI2-HA-ENO2   | pULIG-eno2 F ( <i>Bam</i> H1)   | Primer for amplification of ENO2 (forward)                       | GAATTCGGATCCATGGCTGTCTCAAAGTTTACGCT              |
|                               | pULIG-eno2all R ( <i>Sac</i> I) | Primer for amplification of ENO2 (reverse)                       | CGACCGGGAGCTCCAACCTGTCCACCGTGGTGGAAAT            |
|                               | eno2-1 F                        | Primers for cloning ENO2 from genome and for sequencing          | ATACCAAGTCAGCATACACC                             |
|                               | eno2-2 F                        |                                                                  | TTATCTTCTACCAGAGTTG                              |
|                               | eno2-3 F                        |                                                                  | AAGTCGAATTAACCCCGAA                              |
|                               | eno2-4 F                        |                                                                  | TCTTGTGTCTTTGGATGGT                              |
|                               | eno2-5 F                        |                                                                  | GTTCCGAAGTTTACCACAAC                             |
|                               | eno2-6 F                        |                                                                  | TTCAAGGACGGTAAAGTACGA                            |
|                               | eno2-7 F                        |                                                                  | ACTGGGAAGCTTGTCTCAC                              |
|                               | eno2-8 F                        |                                                                  | CTGGTGAACCTGAAGACACT                             |
|                               | eno2-9 F                        |                                                                  | TTTTCAAAGACTCGTCTGT                              |
| pULGI2-CDC19                  | CDC19- <i>Bam</i> H1 F          | Primer for amplification of CDC19 (forward)                      | AACAGAATTCGGATCCATGTCTAGATTAGAAAGATTGACCTCATTA   |
|                               | CDC19- <i>Xho</i> I R           | Primer for amplification of CDC19 (reverse)                      | GAGATCTCCGCTCGAGAACGGTAGAGACTTCCAAAGTGTGGAGTG    |
|                               | CDC19 (291-310) seqF            | Primers for sequencing CDC19                                     | CGATGTTGACTACCAATCC                              |
|                               | CDC19 (681-700) seqF            |                                                                  | CTTGGTGAACAAGTAAGG                               |
|                               | CDC19 (1078-1097) seqF          |                                                                  | GCTTACTTGCCAACTACGA                              |
|                               | CDC19 (1306-1325) seqF          |                                                                  | TACAGAGGTGTCTCCATT                               |
| pULGI2-PYK2                   | PYK2- <i>Bam</i> H1 F           | Primer for amplification of PYK2 (forward)                       | AACAGAATTCGGATCCATGCCAGATCCAGATTGCAGAGACTAGCT    |
|                               | PYK2- <i>Xho</i> I R            | Primer for amplification of PYK2 (reverse)                       | GAGATCTCCGCTCGAGGAATCTTGACCAACAGTAGAAATGCGTAA    |
|                               | PYK2 (211-230) seqF             | Primers for sequencing PYK2                                      | AAATCGGAACAGCAATCC                               |
|                               | PYK2 (592-611) seqF             |                                                                  | ATGAAGGACTTGAATTCGG                              |
|                               | PYK2 (993-1012) seqF            |                                                                  | TATGCTTCTCGAGAACCGG                              |
| pULGI2-GPM1                   | GPM1- <i>Bam</i> H1 F           | Primer for amplification of GPM1 (forward)                       | AACAGAATTCGGATCCATGCCAAAGTAGTTTGTAGTACACCGGT     |
|                               | GPM1- <i>Xho</i> I R            | Primer for amplification of GPM1 (reverse)                       | GAGATCTCCGCTCGAGTTCTTACCTTGGTGGCAACAGCAGCCGGC    |
|                               | GPM1 (281-300) seqF             | Primer for sequencing GPM1                                       | AAGGTAAGGACAAGGCTGAA                             |
| pULGI2-TPI1                   | TPI1- <i>Bam</i> H1 F           | Primer for amplification of TPI1 (forward)                       | AACAGAATTCGGATCCATGGTGAAGACTTCTTTGTGGTGGTAAC     |
|                               | TPI1- <i>Xho</i> I R            | Primer for amplification of TPI1 (reverse)                       | GAGATCTCCGCTCGAGTTCTTCAAGTGTATGATATCAACAATTC     |
|                               | TPI1 (243-262) seqF             | Primer for sequencing TPI1                                       | CCAAATCAAGGATGTTGGTG                             |
| pULGI2-PGI1                   | PGI1- <i>Bam</i> H1 F           | Primer for amplification of PGI1 (forward)                       | AACAGAATTCGGATCCATGCCAAATCACTTCACTCAACTTCAA      |
|                               | PGI1- <i>Xho</i> I R            | Primer for amplification of PGI1 (reverse)                       | AACAGAATTCGGATCCATGACTGTTACTACTCTTTTGTGAATGTT    |
|                               | PGI1 (252-271) seqF             | Primers for sequencing PGI1                                      | TAACGTCACCGTGTGAGAG                              |
| pULGI2-PGK1                   | PGK1 (697-716) seqF             |                                                                  | GCCAAGAAGTGGTCTTGTGTC                            |
|                               | PGI1 (1178-1197) seqF           |                                                                  | CTACCAACGCTCAACACTCT                             |
|                               | PGK1- <i>Bam</i> H1 F           | Primer for amplification of PGK1 (forward)                       | AACAGAATTCGGATCCATGCTTTATCTCAAAGTGTCTGTCCAA      |
|                               | PGK1- <i>Xho</i> I R            | Primer for amplification of PGK1 (reverse)                       | GAGATCTCCGCTCGAGTTCTTTCGGATAAGAACCAACACCTGG      |
|                               | PGK1 (221-240) seqF             | Primers for sequencing PGK1                                      | AATACTCTTTGGCTCCAGTT                             |
| pULGI2-FBA1                   | PGK1 (510-529) seqF             |                                                                  | TCACTCTTCTATGGTCGGTT                             |
|                               | PGK1 (848-867) seqF             |                                                                  | ACTTCATCTGCTGATGCT                               |
|                               | FBA1- <i>Bam</i> H1 F           | Primer for amplification of FBA1 (forward)                       | AACAGAATTCGGATCCATGGTGTGAACAAATCTTAAAGAGAAG      |
|                               | FBA1- <i>Xho</i> I R            | Primer for amplification of FBA1 (reverse)                       | GAGATCTCCGCTCGAGTAAAGTGTAGTGGTACGGAAAGTTTCCAA    |
| pUL-eno(1-17)                 | FBA1 (296-315) seqF             | Primers for sequencing FBA1                                      | CAGCTTACGGTATCCAGTT                              |
|                               | FBA1 (627-646) seqF             |                                                                  | TTTGACCCAACTCTCCCAA                              |
|                               | eno2(-17)_ <i>Xho</i> I R       | Primers for cloning ENO2 fragments                               | CACCAGATCCACCCTCGAGGTTACCCGGGAGTGTAGACGGATCTAGC  |
| pUL-eno(1-28)/ pULR-eno(1-28) | eno2(-28)_ <i>Xho</i> I R       |                                                                  | CAGATCCACCCTCGAGCTTTTCGGTGGTTAATTCGACTT          |
| pUL-eno(1-30)                 | eno2(-30)_ <i>Xho</i> I R       |                                                                  | CACCAGATCCACCCTCGAGAACACCTTTTCGGTGGTTAATTCGACTTC |
| pUL-eno(1-50)                 | eno2(-50)_ <i>Xho</i> I R       |                                                                  | CACCAGATCCACCCTCGAGTCTCAATTTCCAAAGCTTCTGT        |
| pUL-eno(1-110)                | eno2(-110)_ <i>Xho</i> I R      |                                                                  | CACCAGATCCACCCTCGAGAGGTTAGCACCCAACTTGG           |
| pUL-eno(1-169)                | eno2(-169)_ <i>Xho</i> I R      |                                                                  | AGATCCACCCTCGAGTCTTTCGAAAGCCAAAGCACC             |
| GAPDH promoter                | pGAP_F                          | Primer for sequencing                                            | AGACGGTAGGATTGATTGTAATTCGT                       |

**Table S2. Primers used in this research (continued)**

| Plasmid              | Oligo name           | Description                                      | Sequence (5'-3')                         |
|----------------------|----------------------|--------------------------------------------------|------------------------------------------|
| p413-ADH-TLG2        | <i>Bam</i> H1-TLG2 F | Primer for amplification of TLG2 (forward)       | AGAACTAGTGAATTCATGTTTAGAGATAGAACTAATTAT  |
|                      | <i>Xho</i> 1-TLG2 R  | Primer for amplification of TLG2 (reverse)       | ACATGACTCGAGTCAAAGTAGGTCATCCAAAGCATCATTG |
|                      | ADH pro F            | Primer for sequencing p413-ADH plasmid           | ATGAGCAACGGTATACGG                       |
|                      | TLG2 (140-164) seqF  | Primers for sequencing TLG2                      | ACGATATATCGGCCAGATTGACAGA                |
|                      | TLG2 (444-466) seqF  |                                                  | GCAATTAAGTCGAGAAGAGCTGA                  |
|                      | TLG2 (786-807) seqF  |                                                  | AGAAGTGAGCACTATTTTCAGG                   |
| ΔTLG2 (genome)       | TLG2 (coloP) F       | Primers for checking the sizes of coding regions | GCAAGACAGGAAAGTCTCCAA                    |
|                      | TLG2 (coloP) R       |                                                  | GCAACAGGTCATATGAACGCT                    |
| <i>KanMX4</i> (gene) | <i>KanB</i> -R       | Primers for checking genotypes                   | CTGCAGCAGGAGCCGTAAT                      |
| ΔSEC22 (genome)      | SEC22 (coloP) F      |                                                  | AATTTTCAACCAAAGTGTGTACT                  |
| ΔGOS1 (genome)       | GOS1 (coloP) F       |                                                  | AAAGATGCTTATGAAAAATCTCAGG                |
| ΔPEP12 (genome)      | PEP12 (coloP) F      |                                                  | TGCCTTAGCTGAAAATTGTATTTA                 |
| ΔVPS51 (genome)      | VPS51 (coloP) F      |                                                  | AATCTACCCAGGCCCTAAAAGTATG                |
| ΔBTN2 (genome)       | BTN2 (coloP) F       |                                                  | CGAGAGTTGTATCCAGTTTCTTGT                 |
| ΔSNC2 (genome)       | SNC2 (coloP) F       |                                                  | AGTGATCTTGGTCACATGATATACG                |
| ΔSNX4 (genome)       | SNX4 (coloP) F       |                                                  | AATAACAGTTCAAATCTATGCCG                  |
| ΔSSO1 (genome)       | SSO1 (coloP) F       |                                                  | CACACTAACGACAAAAGCAGATATG                |
| ΔSSO2 (genome)       | SSO2 (coloP) F       |                                                  | TACCCATAAGAGAGCTGGAATATG                 |
| ΔATG1 (genome)       | ATG1 (coloP) F       |                                                  | AAGTTAAGTACCAAGGCCATCTTT                 |
| ΔATG20 (genome)      | ATG20 (coloP) F      |                                                  | ATAAGGCTTGGCTTATTGCTTACT                 |
| ΔATG17 (genome)      | ATG17 (coloP) F      |                                                  | CTTGAATTATTATCTTCTCATCGC                 |

**Miura, et al.**



**Table S3. List of genes and proteins used in this research.**

| Category                          | Accession | Name  | Description                                                                                                                                                                                                                                 |
|-----------------------------------|-----------|-------|---------------------------------------------------------------------------------------------------------------------------------------------------------------------------------------------------------------------------------------------|
| <b>Organelle marker proteins</b>  | YGL008C   | PMA1  | Plasma membrane H <sup>+</sup> -ATPase, pumps protons out of the cell                                                                                                                                                                       |
|                                   | TDL116W   | NUP84 | Subunit of the nuclear pore complex (NPC)                                                                                                                                                                                                   |
|                                   | YKL029C   | MAE1  | Mitochondrial malic enzyme                                                                                                                                                                                                                  |
|                                   | YLR330W   | CHS5  | Component of the exomer complex                                                                                                                                                                                                             |
|                                   | YLR025W   | SNF7  | One of four subunits of the endosomal sorting complex required for transport III (ESCRT-III)                                                                                                                                                |
|                                   | YGL225W   | VRG4  | Golgi GDP-mannose transporter; regulates Golgi function and glycosylation in Golgi                                                                                                                                                          |
|                                   | YOL147C   | PEX11 | Peroxisomal membrane protein required for medium-chain fatty acid oxidation and peroxisome proliferation                                                                                                                                    |
|                                   | YLR208W   | SEC13 | Component of the Nup84 nuclear pore sub-complex, the Sec13p-Sec31p complex of the COPII vesicle coat, and the SEA (Seh1-associated) complex; required for vesicle formation in ER to Golgi transport and nuclear pore complex organization  |
| <b>SNAREs</b>                     | YPL232W   | SSO1  | Plasma membrane t-SNARE involved in fusion of secretory vesicles at the plasma membrane and in vesicle fusion during sporulation                                                                                                            |
|                                   | YMR183C   | SSO2  | Plasma membrane t-SNARE involved in fusion of secretory vesicles at the plasma membrane                                                                                                                                                     |
|                                   | YLR268W   | SEC22 | R-SNARE protein; assembles into SNARE complex with Bet1p, Bos1p and Sed5p; cycles between the ER and Golgi complex; involved in anterograde and retrograde transport between the ER and Golgi                                               |
|                                   | YOR327C   | SNC2  | Vesicle membrane receptor protein (v-SNARE) involved in the fusion between Golgi-derived secretory vesicles with the plasma membrane                                                                                                        |
|                                   | YOL018C   | TLG2  | Syntaxin-like t-SNARE that forms a complex with Tlg1p and Vti1p and mediates fusion of endosome-derived vesicles with the late Golgi                                                                                                        |
|                                   | YGR142W   | BTN2  | v-SNARE binding protein that facilitates specific protein retrieval from a late endosome to the Golgi                                                                                                                                       |
|                                   | YOR036W   | PEP12 | Target membrane receptor (t-SNARE) for vesicular intermediates traveling between the Golgi apparatus and the vacuole                                                                                                                        |
|                                   | YKR020W   | VPS51 | Component of the GARP (Golgi-associated retrograde protein) complex, which is required for the recycling of proteins from endosomes to the late Golgi                                                                                       |
|                                   | YHL031C   | GOS1  | v-SNARE protein involved in Golgi transport, homolog of the mammalian protein GOS-28/GS28                                                                                                                                                   |
|                                   | YOR106W   | VAM3  | Syntaxin-like vacuolar t-SNARE that functions with Vam7p in vacuolar protein trafficking; mediates docking/fusion of late transport intermediates with the vacuole                                                                          |
| <b>Transport</b>                  | YDR517W   | GRH1  | Acetylated, cis-golgi localized protein involved in ER to Golgi transport; homolog of human GRASP65; forms a complex with the coiled-coil protein Bug1p; mutants are compromised for the fusion of ER-derived vesicles with Golgi membranes |
| <b>Autophagy-related proteins</b> | YGL180W   | ATG1  | Protein ser/thr kinase required for vesicle formation in autophagy and the cytoplasm-to-vacuole targeting (Cvt) pathway                                                                                                                     |
|                                   | YBL078C   | ATG8  | Component of autophagosomes and Cvt vesicles; undergoes conjugation to phosphatidylethanolamine (PE)                                                                                                                                        |
|                                   | YPR049C   | ATG11 | Adapter protein for pexophagy and the cytoplasm-to-vacuole targeting (Cvt) pathway                                                                                                                                                          |
|                                   | YLR423C   | ATG17 | Scaffold protein responsible for phagophore assembly site organization; regulatory subunit of an autophagy-specific complex that includes Atg1p and Atg13p                                                                                  |
|                                   | YDL113C   | ATG20 | Sorting nexin family member required for the cytoplasm-to-vacuole targeting (Cvt) pathway and for endosomal sorting                                                                                                                         |
| <b>Cell wall protein</b>          | YDR077W   | SED1  | Major stress-induced structural GPI-cell wall glycoprotein in stationary-phase cells                                                                                                                                                        |

## Supporting References

56. **Yang CK, Ewis HE, Zhang X, Lu CD, Hu HJ, Pan Y, Abdelal AT, Tai PC.** 2011. Nonclassical protein secretion by *Bacillus subtilis* in the stationary phase is not due to cell lysis. *J. Bacteriol.* **20**: 5607-5615.

57. **Vizcaíno JA, Côté R, Reisinger F, Barsnes H, Foster JM, Rameseder J, Hermjakob H, Martens L.** 2010. The Proteomics Identifications database: 2010 update. *Nucleic Acids Res.* **38**: D736-742.

58. **Barsnes H, Vizcaíno JA, Eidhammer I, Martens L.** 2009. PRIDE Converter: making proteomics data-sharing easy. *Nat. Biotechnol.* **27**: 598-599.
